1 **Title: Determinants of Minimum Acceptable Diet among 6–23 Months Age Children in**  
2 **Ethiopia: A Multilevel Analysis of The Ethiopian Demographic Health Survey**

3

4 **Short title: Determinants of Minimum Acceptable Diet**

5

6 Aberash abay<sup>1</sup> ¶\*, Dejen Yemane<sup>2</sup> ¶, Abate Bekele<sup>3</sup> ¶, Beyene Meressa<sup>2</sup>

7 <sup>1</sup>School of Public Health, College of Health Sciences, Mekelle University, Mekelle, Tigray,  
8 Ethiopia

9 <sup>2</sup>Department of Environmental Health and Behavioral Sciences, School of Public Health,  
10 College of Health Sciences, Mekelle University, Mekelle, Tigray, Ethiopia

11 <sup>3</sup>Department of Biostatistics, School of Public Health, College of Health Sciences, Mekelle  
12 University, Mekelle, Tigray, Ethiopia

13 \* Corresponding Author

14 E-mail: beyene2006m@gmail.com[BM]

16 **Abstract**

17 **Background:** Though infant and young children should be fed according to a minimum  
18 acceptable diet to ensure appropriate growth and development, only 7% of Ethiopian 6-23  
19 months age children meet the minimum acceptable dietary standards, which is lower than the  
20 national target of 11% set for 2016. Therefore, this study aims to assess the individual and  
21 community level determinants of minimum acceptable diet among 6–23 months age children in  
22 Ethiopia.

23 **Methods:** This study analyzed retrospectively a cross-sectional data on a weighted sample of  
24 2919 children aged 6-23 months nested within 617 clusters after extracting from Ethiopian  
25 Demographic and Health Survey 2016 via the link [www.measuredhs.com](http://www.measuredhs.com). By employing bi-  
26 variate multilevel logistic regression model, variables which were significant at the p-value <  
27 0.25 were included in multivariable multilevel logistic regression analysis. Finally, variables  
28 with p-value < 0.05 were considered as significant predictors of minimum acceptable diet.

29 **Results:** Only 6.1% of 6-23 months age children feed minimum acceptable diet in Ethiopia.  
30 Children 18-23 months age (AOR=3.7, 95%CI 1.9, 7.2), father's with secondary or higher  
31 education (AOR=2.1, 95%CI 1.2, 3.6), Employed mothers (AOR=1.7, 95%CI 1.2, 2.5), mothers  
32 have access to drinking water (AOR=1.9, 95%CI 1.2, 2.9), mothers with media exposure  
33 (AOR=2.1 95%CI 1.1, 2.7) were positive individual level predictors. Urban mothers (AOR=4.8,  
34 95%CI 1.7, 13.2)) and agrarian dominant region (AOR=5.6, 95%CI 2.2, 14.5) were community  
35 level factors that significantly associated with minimum acceptable diet of 6–23 months age  
36 children.

37 **Conclusion:** Both individual and community level factors were significantly associated with  
38 minimum acceptable diet of 6-23 months age children in Ethiopia, suggesting that nutritional

39 interventions designed to improve child health should not only be implemented at the individual  
40 level but tailored to community context as well.

41 **Keywords:** Determinants, Ethiopia Demographic Health Survey, Minimum Acceptable Diet,  
42 Multilevel Analysis

## 44 **Introduction**

45 After 6 months, breast milk is no longer adequate to meet the nutritional needs and increasing  
46 demand of nutritional requirements of infants and children[1]. Complementary feeding is the  
47 process of transition from exclusive breastfeeding to other foods besides breast milk[2]. During  
48 this period timely introduction of complementary feeding with a variety of foods should be  
49 added to the child's diet to ensure their nutritional requirement[3]. World Health Organization  
50 (WHO) has established guidelines for infant and young child feeding (IYCF) practices for 6–23  
51 months age children by considering minimum acceptable diet (MAD) as one of the eight core  
52 indicators of complementary feeding [4]. It is the combination of minimum dietary diversity and  
53 minimum meal frequency. Minimum dietary diversity for breastfed and non breast feed children  
54 6-23 months is defined as receiving four or more food groups out of the seven food groups[5]  
55 [7].

56 Minimum meal frequency for breastfed and non breast feed 6-23 month children is defined as  
57 two or more feedings of solid, semi-solid, or soft food for 6-8 months, three or more feedings for  
58 9-23 months breast feed and four times for non breast feed children[5].

59 Low dietary diversity and meal frequency practices are determinant for health and growth in  
60 children less than 2 years of age. They increase the risk of under-nutrition, illness, and mortality  
61 in infants and young children [6]. Even with optimum breastfeeding, children will become  
62 stunted if they do not receive sufficient dietary diversity and frequency over 6 months of age [7].

63 Supplementing breast feeding with nutritious complementary foods can reduce stunting among  
64 children of this age by 20% [8].

65 According to the recent demographic and health survey reports of 10 Asian and African  
66 countries, including Ethiopia feeding a child minimum acceptable diet ranges from 7% in

67 Ethiopia to 36% in Nepal. This indicates that, feed the minimum acceptable diet is a major  
68 problem both globally and in developing countries[ 1,3, 9-16].

69 The Ethiopian government has been implementing the national nutrition program, IYCF and has  
70 recently developed a multi-sectoral plan of nutrition intervention (Sekota Declaration), which  
71 aims to address the immediate, basic and underlying causes of malnutrition to end child under  
72 nutrition in Ethiopia by 2030 [17]. These interventions are meant to tackle the nutrition problems  
73 in children, including those with inappropriate feeding. However, the progress was not  
74 satisfactory, particularly; the MAD has increased from 3% to 7% in a decade (2005-2016).

75 Factors associated with the minimum acceptable diet are complex, ranging from the individual to  
76 the community level factors. Though some studies conducted about determinants of  
77 complementary feeding in Ethiopia, no information was documented about minimum acceptable  
78 diet independently. However, these small scale studies were limited in scope as the data used  
79 were not nationally representative. In addition, they are also limited in their methodology in  
80 which they have applied traditional logistic regression to identify aforementioned predictors of  
81 minimum acceptable diet, using a traditional level logistic regression analysis to analyze a data  
82 that has a hierarchical structure (i.e. Children are nested within the communities) violates the  
83 independence assumptions of regression and gives an incomplete picture to understand the true  
84 association of minimum acceptable diet and its determinants. Likewise, findings from such  
85 studies could not be generalized to the entire Ethiopian children.

86 Hence, to address these limitations and to further document the significant effect of individual  
87 and community level factors on minimum acceptable diet, this study utilized a multilevel logistic  
88 regression model. Therefore, the purpose of this study will be to determine the individual and  
89 community level factors that are associated with minimum acceptable diet in Ethiopia.

## 90 **Methods and materials**

### 91 **Data source and study subjects**

92 For this study, the EDHS 2016 child recode data were accessed from  
93 [www.measuredhs.com](http://www.measuredhs.com). It is the recent and the fourth nationally representative survey  
94 data from 9 regions and two administrative cities. The survey used a two-stage cluster  
95 sampling design with rural-urban and regions as strata yielding 21 sampling strata. In the  
96 first stage, a total of 645 enumeration areas (EAs) was selected. An EA is a geographic  
97 area consisting of 200-300 household, which served as a counting unit for the census. In  
98 the second stage, a fixed number of 28 households per cluster were selected randomly  
99 from the household listing. A total of 16,650 eligible households and 15,683 women (15-  
100 49 years) were interviewed, making up response rates of 98% and 95%, respectively. All  
101 women who had at least one child living with them who was last born two-years  
102 preceding the survey were asked questions about the types of food the child had  
103 consumed during the day or night before the interview. Mothers who had more than one  
104 child within the two years preceding the survey were asked questions about the youngest  
105 child living with them [1].

106 In our study, a total of 2919 children of 6-23 months age who had measurement on their  
107 feeding behavior and who live with their mother during the survey were included.  
108 Accordingly, children who did not live with their mother during the survey (n=26), and  
109 those children's who had incomplete information about MAD (n=98) were excluded from  
110 our study. The child recode data used in this study comprised all the data related with  
111 children and their parents. Further, the details of sampling design, data collection, and  
112 data quality are available in the EDHS 2016 reports [ 1].

### 113 **Study variables**

114 The DHS recode-6 manual and questionnaire at the end the EDHS 2016 report along with  
115 other relevant literatures were used to select appropriate variables for current analysis.  
116 The outcome variable was minimum acceptable diet (MAD). It is a binary outcome  
117 variable and coded as 0 if the child didn't feed minimum acceptable diet and coded as 1 if  
118 the child feed a minimum acceptable diet. The child is said to be fed with MAD if he/she  
119 had both minimum meal frequency and dietary diversity in both BF and non-BF children

120 (39). The children who received solid, semi-solid or soft foods, two times for breastfed  
121 infants 6–8 months, three times for breastfed children 9–23 months and four times for  
122 non-breastfed children is said to have minimum meal frequency. The children with 6–23  
123 months of age who received foods from four or more food groups of the seven food  
124 groups (Cereals, Legumes and nuts, Dairy products, Eggs, Flesh foods, Vitamin A rich  
125 fruits and dark green leafy vegetables and other fruits) are said to have minimum dietary  
126 diversity [2].

127 In this study, the effect of two-level explanatory factors i.e. the individual and community  
128 level factors was examined. The relationship between the explanatory variables and the  
129 minimum acceptable diet is depicted using the socio-ecologic model [18]. According to  
130 this model, individual dietary or health behavior is not only determined by the  
131 individual's characteristics, but also the community level attributes (**Fig 1**). The  
132 individual level variables are further categorized as paternal and household  
133 characteristics, and child related variables. While, at community level, place of residence  
134 (either urban vs. rural or by agro-ecologic regions) and community level aggregate  
135 variables such as community poverty, women's education, media exposure and ANC  
136 utilization were included. The EDHS did not capture data that can directly describe the  
137 characteristics of the community/clusters. Hence, we created community variables by  
138 aggregating the individual mothers' characteristics within their clusters. The aggregates  
139 were computed using the average values of the proportions of women in each category of  
140 a given variable. Likewise, based on national median values the aggregate values were  
141 categorized into groups.

## 142 **Statistical analysis**

143 The data were analyzed using STATA version 12. A sampling weight was used for computing all  
144 descriptive statistics to adjust for the non-proportional allocation of the sample to different  
145 regions and their urban and rural areas and for the possible differences in response rates. Hence,  
146 the actual representativeness of the survey results at both the national and regional levels is  
147 ensured. The 'Svy' command was used to allow for adjustments for the cluster sampling design.  
148 Tables were used for data presentation. Frequency and percentage were used to report categorical  
149 variables.

150 To examine the effect of multilevel factors on the individual dietary behavior, multilevel  
151 modeling approach was used. The nested nature of EDHS data makes the use of traditional  
152 regression methods inappropriate because of the assumption of independence among  
153 individuals within the same group, assumption of equal variance across groups which are  
154 inherent in traditional regression methods are violated. Therefore, in this study, a two-level  
155 mixed effect logistic regression analysis was employed in order to estimate both independent  
156 (fixed) effects of the explanatory variables and community-level random effects on feeding  
157 MAD. The first level represents the individual (children) and the second level is the cluster  
158 (community). Hence, the log of the probability of feeding MAD was modeled using two-level  
159 multilevel model as follows:

$$160 \text{Log}\left(\frac{\pi_{ij}}{1 - \pi_{ij}}\right) = Y_{ij} = \beta_0 + \beta_1 X_{ij} + \beta_2 Z_{ij} + u_j$$

161 Where,  $Y_{ij}$  Is the feeding of MAD for the individual  $I$  in  $j$  cluster/community;  $X_{ij}$  and  $Z_{ij}$  are  
162 individual and community level variables for the  $i^{\text{th}}$  individual in group  $j$ , respectively. The  $\beta$ 's  
163 are fixed coefficients indicating a unit increase in  $X$  can cause a  $\beta$  unit increase in probability  
164 feeding MAD. While, the  $\beta_0$  is intercept that is the effect on feeding MAD when the effect of all  
165 explanatory variables absent (38). The  $u_j$  shows random effect (effect of the community on  
166 mother's decision to provide MAD) for the  $j^{\text{th}}$  community. By assuming each community has  
167 different intercept ( $\beta_0$ ) and fixed coefficient ( $\beta$ ), the clustered data nature and the within and  
168 between community variations were taken in to account. The measures of community variation  
169 (random-effects) was estimated as intra class correlation coefficient (ICC) which is proportion of  
170 the total variance in feeding MAD due to variables operating at a community level. Hence, the  
171 ICC was estimated as:  $\rho = (\sigma_u^2 / (\sigma_u^2 + \pi^2 / 3))$ , Where,  $\rho$  is the ICC,  $\sigma_u^2$  is the variance at the  
172 community level;  $\pi^2 / 3 = 3.29$  represent the fixed individual level variance (37). Given the above  
173 assumptions, four models were developed, namely: Null-model – is a model with no explanatory  
174 variables; Model I – is a model with only individual level factors are controlled; Model II – a  
175 model with only community level factors are controlled and Model III – is also called combined  
176 model which controls the effect of both individual and community level explanatory variables on  
177 mothers decision to provide MAD to their child (**Table 1**).

178 The null model – the model with no covariates – was fitted to examine the between community  
179 variation and to justify the use multilevel analysis. Likewise, about 40% of the total variance



180 (ICC) in the odds of feeding a child with MAD is due to community level factors ( $P < 0.001$ ),  
 181 indicating using multilevel modeling is better to get valid estimates than using ordinary logistic  
 182 regression. The Proportional Change in Variance (PCV) was computed for each model with  
 183 respect to the empty model to understand the relative contributions of both individual and  
 184 community level variables to the community level variance on feeding MAD to a child. It was  
 185 calculated as  $PCV = (V_e - V_{mi}) / V_e$ ; where,  $V_e$  is variance in the empty model and  $V_{mi}$  is  
 186 variance in successive models (**Table 1**).

187 The between-community variability declined in successive models, from 39.6% in null model, to  
 188 28.3% in individual-level only model, 27.5% in community-level only model and 26.6% in  
 189 combined model. Akaike information criterion (AIC) was used to select a best model that  
 190 explains the variation in feeding MAD well. The model with the lowest AIC is the preferred,  
 191 accordingly the combined model showed lowest AIC than others. The combined model implied  
 192 that 44.9% of the total explained variance in the odds of feeding MAD to a child could be  
 193 attributed to both individual and community level characteristics in the model. However, the  
 194 variance in the combined model remained significant ( $p < 0.001$ ), indicating the presence of other  
 195 community level factors – which were not included in our model – that can explain the feeding  
 196 of MAD to a child. In other words, even though the unexplained community level variance was  
 197 reduced in the mixed model, the remaining community-level variance still remains significant  
 198 (**Table 1**).

199 **Table 1:** Individual and community-level variances for multilevel random intercept Logit  
 200 models predicting feeding 6-23 months age children with minimum acceptable diet in Ethiopia  
 201 2016.

| Random effect | Null model | Model I | Model II | Model III (combined) |
|---------------|------------|---------|----------|----------------------|
| Variance      | 2.16*      | 1.30*   | 1.25*    | 1.19*                |
| ICC (%)       | 39.6       | 28.3    | 27.5     | 26.6                 |
| PCV (%)       | Reference  | 39.8    | 42.1     | 44.9                 |
| AIC           | 1296.4     | 1153.3  | 1238.7   | 1142.7               |

202 Note: Null model – a model with no covariates; Model I – only individual level explanatory  
 203 variables were included; Model II – only community level explanatory variables were included;  
 204 Model III (Combined) – both individual and community level variables were included;  
 205 \*significant at  $p < 0.001$ ; AIC: Akaike Information Criterion.

206

207 The measures of association (fixed-effects) between the odds of feeding a child with MAD and  
208 various explanatory variables were expressed as adjusted odds ratio (AOR) at their 95 %  
209 confidence intervals (CI). The statistical significance was set at p-value of 0.05. The  
210 multicollinearity among independent variables was checked using variance inflation factor  
211 (VIF). The VIF value of all predictor variables was less than 10 indicating the absence of a  
212 significant correlation among the explanatory variables. The presence of interaction among the  
213 explanatory variables was checked and there was no significant interaction between them.

214 This study was approved by the Ethical Review Committee of College of Health Sciences,  
215 Mekelle University . Then, a written inquiry to access data from the measure DHS website was  
216 submitted to the ORC macro INC, Chicago and permission was obtained accordingly. This study  
217 was based on the EDHS 2016 dataset with all participants' identifiers removed, no further effort  
218 was made to trace back the subjects and the data was kept confidential as per the agreement  
219 made with the ORC macro. Otherwise, the DHS was approved by the Ethiopian Health Nutrition  
220 and Research Institute (EHNRI) Review Board and the National Research Ethics Review  
221 Committee (NRERC) at the Ministry of Science and Technology, Ethiopia.

## 222 Results

### 223 Individual level characteristics of the study participants

224 Five hundred fifty-six (19%) children were in the age group 6–8 months, 492 (17%) in age 9-11  
225 months, 1071 (37%) in 12–17 months and the rest 799 (27%) found in 18–23 months. More than  
226 half of the children (52.9%) were females. More than two-third 1942 (67%) children were born  
227 within more than 24 months of pregnancy interval. About three-fourth mothers 2110 (72%) were  
228 in age between 20-34 years. Sixty-two percent of the mothers and 1207 (44%) of fathers had no  
229 education. About forty percent of participants were Muslims followed by Orthodox 998 (34.2%).  
230 Regarding the employment status, 1685 (58 %) of the mothers were not working at the time of  
231 EDHS 2016 survey. More than three-fourth 2521 (86.4%) of households were headed by males.  
232 More than two-third 2009 (69%) of the households have at least five family sizes and 1387  
233 (47.5%) were with two under five children. More than half of households 1519 (53%), travel 30  
234 minutes or longer round trip to fetch drinking water. On the other hand, only 90 (3%) were used  
235 efficient cooking fuel (electricity) but most 2373 (81.9%) of households use wood as cooking  
236 fuel. The proportions of mothers with no ANC visit and at least 4 visits during their last  
237 pregnancy were nearly the same, 1019 (35%) and 1002 (34.5%), respectively (**Table 2**).

238 **Table 2:** The individual level characteristics of 6-23 months age children in Ethiopia, EDHS  
239 2016(n=2919).

| Individual level variables | Frequency (n) | Percentage (%) |
|----------------------------|---------------|----------------|
| Child age(months)          |               |                |
| 6-8 month                  | 556           | 19.0           |
| 9-11 month                 | 492           | 16.9           |
| 12-17 month                | 1071          | 36.7           |
| 18-23 month                | 799           | 27.4           |
| Child Sex                  |               |                |
| Female                     | 1,543         | 52.9           |
| Male                       | 1376          | 47.1           |
| Birth Order                |               |                |
| First                      | 550           | 18.9           |
| Second –fourth             | 1256          | 43.0           |
| Fifth and above            | 1113          | 38.1           |

|                    |       |      |
|--------------------|-------|------|
| Birth Interval     |       |      |
| No previous birth  | 552   | 18.9 |
| < 24 months        | 422   | 14.5 |
| >= 24 months       | 1942  | 66.6 |
| Mother age         |       |      |
| <20                | 361   | 12.4 |
| 20-34              | 2110  | 72.3 |
| 35-49              | 448   | 15.3 |
| Mother Education   |       |      |
| No education       | 1,797 | 61.6 |
| Primary education  | 897   | 30.7 |
| Secondary & Higher | 225   | 7.7  |
| Mother Occupation  |       |      |
| Unemployed         | 1,685 | 57.7 |
| Employed           | 1,234 | 42.3 |
| Father Education   |       |      |
| No education       | 1,207 | 44.1 |
| Primary education  | 1,156 | 42.1 |
| Secondary & Higher | 378   | 13.8 |
| Father Occupation  |       |      |
| Unemployed         | 223   | 7.7  |
| Employed           | 2,696 | 92.3 |

240

241 **Table 2:** continued

| Individual level variables | Frequency (n) | Percentage (%) |
|----------------------------|---------------|----------------|
| ANC visit                  |               |                |
| No                         | 1019          | 35.1           |
| 1-3                        | 884           | 30.4           |
| >=4                        | 1002          | 34.5           |
| Media Exposure             |               |                |
| Yes                        | 978           | 33.5           |

|                            |       |      |
|----------------------------|-------|------|
| No                         | 1941  | 66.5 |
| Religion                   |       |      |
| Protestant                 | 642   | 22.0 |
| Orthodox                   | 998   | 34.2 |
| Muslim                     | 1,176 | 40.3 |
| Others                     | 103   | 3.5  |
| Household wealth           |       |      |
| Poorest                    | 681   | 23.3 |
| Poor                       | 623   | 21.4 |
| Middle                     | 644   | 22.1 |
| Richer                     | 531   | 18.2 |
| Richest                    | 440   | 15.0 |
| Drug use Status            |       |      |
| Yes                        | 24    | 0.8  |
| No                         | 2895  | 99.2 |
| Time to get drinking water |       |      |
| < 30 minutes               | 1,370 | 47.4 |
| ≥ 30 minutes               | 1519  | 52.6 |
| Type of cooking fuel       |       |      |
| Charcoal                   | 156   | 5.4  |
| Electric                   | 91    | 3.1  |
| Wood                       | 2373  | 82.0 |
| Animal dug                 | 173   | 6.0  |
| Others                     | 102   | 3.5  |
| Family size                |       |      |
| < 5 family                 | 910   | 31.0 |
| ≥ 5 family                 | 2009  | 69.0 |
| Under 5 Children           |       |      |
| One                        | 1128  | 38.6 |
| Two                        | 1387  | 47.5 |
| Three and above            | 404   | 13.9 |

Household head

|        |       |      |
|--------|-------|------|
| Male   | 2,521 | 86.3 |
| Female | 398   | 13.7 |

242 Note: Birth interval, father education, ANC visits, time to get drinking water and types of  
 243 cooking fuel have 3, 178, 14, 30 and 24 missing values, respectively.

244 **Community level characteristics of the study subjects**

245 More than nine in ten mothers 2679 (91.8%) were from the Agrarian dominant region. More than  
 246 half 1937 (66.4%) of the mothers were from the community with high poverty. More than half  
 247 mothers 1506 (52%) were from the low media access community. Most of the mothers 2576  
 248 (88.3%) were from rural areas and 2008 (69%) of the mothers were from the community with  
 249 high ANC utilization (**Table 3**).

250 Table 3: The Community level characteristics of 6-23 months age children in Ethiopian, EDHS  
 251 2016 (n=2919)

| Community level           | Frequency (n) | Percentage (%) |
|---------------------------|---------------|----------------|
| Residence                 |               |                |
| Urban                     | 343           | 11.7           |
| Rural                     | 2576          | 88.3           |
| Region                    |               |                |
| Pastoralist dominant      | 144           | 4.9            |
| Agrarian dominant         | 2679          | 91.8           |
| City dwellers             | 96            | 3.3            |
| Community poverty         |               |                |
| High                      | 1937          | 66.4           |
| Low                       | 982           | 33.6           |
| Community women education |               |                |
| Low                       | 2053          | 70.3           |
| High                      | 866           | 29.7           |
| Community media exposure  |               |                |
| Low                       | 1506          | 51.6           |
| High                      | 1413          | 48.4           |
| Community ANC utilization |               |                |
| Low                       | 911           | 31.0           |
| High                      | 2008          | 69.0           |

252

253 **Minimum acceptable diet feeding practice**

254 In this study, of the total of 2919 children 6-23 months of age, only 6.1% were fed MAD. On the  
255 other hand, the proportion of children with minimum dietary diversity and minimum meal  
256 frequency were 11% and 42%, respectively (**Table 4**).

257 Table 4: Minimum meal frequency, Dietary diversity and minimum acceptable practice among  
258 children 6-13 months of age in Ethiopia, 2016 (n=2919).

| Diets                   | Frequency (n) | Percentage (%) |
|-------------------------|---------------|----------------|
| Minimum acceptable diet |               |                |
| No                      | 2742          | 93.9           |
| Yes                     | 177           | 6.1            |
| Meal frequency          |               |                |
| No                      | 1697          | 58.1           |
| Yes                     | 1222          | 41.9           |
| Dietary diversity       |               |                |
| No                      | 2588          | 88.7           |
| Yes                     | 331           | 11.3           |

259

260

261 **Individual and community level determinants of feeding MAD**

262 The individual and community level determinants of feeding MAD are presented in Table 5. At  
263 individual level: child age, father's education, mother's occupation, time to get drinking water,  
264 media exposure; and at community level: region of residence were independent predictors of  
265 feeding the child MAD.

266 The odds of feed the child MAD was nearly 4 times (AOR=3.7; 95%CI 1.9, 7.3) higher among  
267 children in age between 18-23 months than children at age 6-8 months. The odds of feeding the  
268 child with a minimum acceptable diet were 70% (AOR=1.7; 95%CI 1.2, 2.5) higher among  
269 employed mothers compared with unemployed mothers.

270 Mothers who have media exposure had nearly 2 times (AOR=1.95; 95%CI 1.3, 2.9) higher odds  
271 of feeding a MAD for their children than mothers with no media access. The odds of feeding  
272 MAD to a child was twice (AOR=2.0; 95%CI 1.3, 3.1) higher among mothers who travel less  
273 than 30 minutes to fetch drinking water. Father's education was significantly positively  
274 associated with feeding minimum acceptable diet to the child. Fathers who educated secondary  
275 or higher had 2.4 times (AOR=2.4; 95%CI 1.4, 4.0) higher odds to feed their children MAD.

276 The region was a significant predictor of feeding the child MAD. Mothers from agrarian region  
 277 had 5 times (AOR=5.1; 95% CI 2.0, 13.1) and city dwellers had nearly 5 times (AOR=5.4;  
 278 95%CI 1.9, 14.8) higher odds to feed their children MAD respectively compared with mothers  
 279 from pastoralist (**Table 5**).

280 **Table 5:** Individual and community level determinants of feeding minimum acceptable diet for  
 281 6-23 months age children in Ethiopia, 2016(n=2919).

| Individual and community-level | COR(95%CI)     | AOR(95%CI)     | p-value |
|--------------------------------|----------------|----------------|---------|
| Child age in months            |                |                |         |
| 6-8 month                      | 1:00           | 1:00           |         |
| 9-11 month                     | 3.2(1.6, 6.4)  | 3.1(1.5,6.4)   | 0.002   |
| 12-17 month                    | 3.2(1.7, 6.1)  | 3.5(1.8,6.7)   | 0.0001  |
| 18-23 month                    | 3.6(1.9, 6.8)  | 3.7(1.9,7.3)   | 0.0001  |
| Time to get drinking water     |                |                |         |
| ≥ 30 minutes                   | 1:00           | 1:00           |         |
| < 30 minutes                   | 3.2(2.1, 4.7)  | 2(1.3,3.1)     | 0.001   |
| Mother's Occupation            |                |                |         |
| Unemployed                     | 1:00           | 1:00           |         |
| Employed                       | 1.7(1.4, 2.8)  | 1.7(1.2,2.5)   | 0.003   |
| Media Exposure                 |                |                |         |
| No exposure                    | 1:00           | 1:00           |         |
| Has media exp                  | 2(1.3, 3.3)    | 1.7(1.3,2.9)   | 0.002   |
| Father Education               |                |                |         |
| No education                   | 1:00           | 1:00           |         |
| Primary                        | 2.1(1.3, 3.3)  | 1.4(0.9,2.3)   | 0.152   |
| Secondary or higher            | 4.6(2.9, 7.3)  | 2.4(1.4,4.0)   | 0.001   |
| Region                         |                |                |         |
| Pastoralist dominant           | 1:00           | 1:00           |         |
| Agrarian dominant              | 8.9(3.5, 22.4) | 5.1(2, 13.1)   | 0.001   |
| City dwellers                  | 16.0(5.9,42.9) | 5.4( 1.9,14.8) | 0.001   |

282



284 **Discussion**

285 This study used multilevel logistic regression analysis to address these two level factors.  
286 Accordingly the individual level factors such as the child's age, mother's occupation, father's  
287 education, access to drinking water and media exposure showed a significant association with  
288 feeding minimum acceptable diet.

289 The age of the child was positively associated with feeding minimum acceptable diet for 6-23  
290 months age children. Children with age 18-23 months were found to be significantly higher odds  
291 to be feed minimum acceptable diet than 6-8 months. This finding is consistent with evidences  
292 from Indonesia, Pakistan, Ghana and Uganda [7, 8, 19, 20]. This might be due to late  
293 introduction of complementary feeding and when they start complimentary feeding on time; they  
294 included only milk or cereal products. Other possibility could be mothers may perceive that  
295 younger the children, the poor ability of intestine to digest certain foods like banana, egg,  
296 pumpkin, carrot, green vegetables and Meat [21]. This could be further justified by traditional  
297 beliefs and practices, during introducing complementary food to infants in rural community,  
298 infants may develop diarrhea due to poor hygienic condition, but mothers could associate this  
299 problem with taking different food items and eventually she might not permit the child to taste  
300 unfamiliar foods. It can also be attributed to the feeding interest of the child too.

301 Father's education level was significantly and positively associated with feeding the child  
302 minimum acceptable diet. Other studies in South Asia, Bangladesh and Nepal had reported a  
303 similar finding indicating that children whose fathers had secondary or higher level of education  
304 were more likely to be provided with the recommended acceptable diet as compared to the  
305 children whose fathers did not have any education [22, 23, 24]. This could be due to educated  
306 fathers were more likely to have information (media exposure), understand educational messages  
307 about child feeding easily, might have received lessons on child feeding in the curricula at school  
308 that would increase their knowledge about the importance of child feeding. However, different  
309 finding was reported from study done in Serilanka, in which paternal education was not  
310 associated with any of complementary feeding indicators [25]. This difference could be due to  
311 study area and sample size. The current study included large population from different  
312 geographic regions with various culture, beliefs, and traditions.

313 Mother's occupational status was also significant predictor of feeding minimum acceptable diet  
314 to the child. Children who have employed mothers were more likely to be feed minimum  
315 acceptable diet. This result is consistent with study conducted in Indonesia and Serilanka [19,  
316 25]. It could give us an indication that mother's earning ability is an important factor in feeding  
317 the child a minimum acceptable diet in Ethiopia. Enhanced access to resources, wider social  
318 networks and growing understanding of their social environment could increases opportunities to  
319 feed the child minimum acceptable diet than unemployed mothers.

320 This study also revealed that time to get drinking water showed a positive effect on feeding the  
321 children a minimum acceptable diet. Mothers who travel less than 30 minutes round trip to fetch  
322 drinking water had higher odds to feed their children a minimum acceptable diet than those who  
323 travel 30 or more minutes. This could be attributed to that, mothers who travel less than 30  
324 minutes to fetch drinking water could have time to take care of their children, including feeding  
325 them properly and adequately which therefore could lead to meeting their MAD. In addition, if  
326 there is access to drinking water source this could also encourage households to use water for on-  
327 plot gardening, which can improve dietary diversity. Furthermore, if there is access to drinking  
328 water, time spent to fetching water could be invested in additional productive activities that can  
329 augment economic and educational empowerment of mothers.

330 In this study exposure to media was also a significant predictor of feeding minimum acceptable  
331 diet to the child. Families who have exposure to media had increased odds of feeding minimum  
332 acceptable diet to their child than those who have no media exposure. This is supported by  
333 studies conducted in south Asia and India which reported low feeding practice of minimum  
334 acceptable diet for the children in the families who have no media exposure [24, 26]. This might  
335 be pointing to the influence of media on behavioral change to improve the minimum acceptable  
336 diet through enhancing mother's knowledge on feeding a minimum acceptable diet to their  
337 children.

338 From the community level factors geographic region of the study participants was found to be  
339 statistically significant predictor of feeding minimum acceptable diet in Ethiopia. Children from  
340 city dwellers and agrarian dominant had more odds to be fed minimum acceptable diet than  
341 children from pastoralist dominant region. This might be due to Ethiopia is large country with

342 diverse cultures, religions reflected by different food habits and traditional practices [21]. This  
343 could also be linked with less food production and higher levels of poverty.

344 Furthermore, the current study found that; even though most variation on feeding the child  
345 minimum acceptable diet was explained by individual-level factors, some of the variation was  
346 also explained by unmeasured community-level factors. The random effects of the community-  
347 level model were significant in explaining feeding the child minimum acceptable diet, even it  
348 reduced, from 39.7% in null model to 27% in the full model. This indicates feeding the child  
349 minimum acceptable diet was explained by both individual and community-level factors. The  
350 efforts of improving the practice of MAD in Ethiopian should address both factors operating at  
351 individual and community level.

## 352 **Conclusion**

353 The proportion of young children aged between 6–23 months receiving minimum acceptable diet  
354 was very low (6.1%). This study also showed that this low proportion of minimum acceptable  
355 diet among 6-23 months age children is determined by number of individual and community  
356 level factors such as age of the child, mother's occupation, father's education level, and media  
357 exposure, access of household drinking water and region of residence. Therefore, interventions  
358 to improve MAD practice should not only be implemented at the individual level but also be  
359 tailored to the community context. Utilizing media to promote feeding young children with  
360 minimum acceptable diet through enhancing mother's knowledge on child feeding practices and  
361 advocacy for appropriate complementary feeding, particularly on meeting MAD and nutrition  
362 education and social and behavior change interventions should be strengthened targeting the  
363 infants and children aged 6–8 months and unemployed mothers.

365 **Acknowledgments**

366 Our sincere and deepest gratitude goes to Mekelle University, College of Health Sciences and  
367 MU- NMBU for financial support of this study. We are also very grateful to Measure DHS for  
368 making the data freely available and we would like to extend our heartfelt thanks and  
369 appreciation to family members of Mrs.Aberash Abay (Haset Beyene, Nobel Beyene, Lidiya  
370 Beyene and Beyene Meressa) and friends for their endless support and providing the required  
371 courage during the research work.

372 **Author Contributions**

373 **Conceptualization:** Aberash Abay, Dejen Yemane, Abate Bekele, Beyene Meressa

374 **Formal analysis:** Aberash Abay, Dejen Yemane, Abate Bekele, Beyene Meressa

375 **Funding acquisition:** Aberash Abay

376 **Investigation:** Aberash Abay, Dejen Yemane, Abate Bekele

377 **Methodology:** Aberash Abay, Dejen Yemane, Abate Bekele, Beyene Meressa

378 **Project administration:** Aberash Abay, Dejen Yemane, Abate Bekele

379 **Supervision:** Dejen Yemane, Abate Bekele, Beyene Meressa

380 **Validation:** Aberash Abay, Dejen Yemane, Abate Bekele, Beyene Meressa.

381 **Writing original draft:** Aberash Abay, Dejen Yemane, Abate Bekele, Beyene Meressa.

382 **Writing review & editing:** Aberash Abay, Dejen Yemane, Abate Bekele, Beyene Meressa

384 References

- 385 1. Central Statistical Agency. Ethiopia Demographic and Health Survey [Internet]. Addis Ababa;  
386 2016. Available from: [www.DHSprogram.com](http://www.DHSprogram.com)
- 387 2. World Health Organization. Guiding Principles for Complementary Feeding of the Breastfed  
388 (PAHO and WHO) [Internet]. Washington, D.C; 2001. Available from: <http://www.paho.com>
- 389 3. Central Statistics of Afghanistan. Afghanistan Demographic and Health Survey [Internet].  
390 Kabul; 2015. Available from: [www.DHSprogram.com](http://www.DHSprogram.com).
- 391 4. Republic FD. National Nutrition Programme Republic of Ethiopia. published [Internet].  
392 2013;(June 2013). Available from: [www.unicef.org/ethiopia/National\\_Nutrition\\_Programme.pdf](http://www.unicef.org/ethiopia/National_Nutrition_Programme.pdf)
- 393 5. USAID. Nutrition Indicator Reference Sheets : External Source Data [Internet]. 2010.  
394 Available from: [http://pdf.usaid.gov/pdf\\_docs/PNADT413.pdf](http://pdf.usaid.gov/pdf_docs/PNADT413.pdf)
- 395 6. Beyene M, Worku AG, Wassie MM. Dietary diversity, meal frequency and associated factors  
396 among infant and young children in Northwest Ethiopia: a cross- sectional study. BMC Public  
397 Health [Internet]. 2015;15(1):1007. Available from:  
398 <http://bmcpublihealth.biomedcentral.com/articles/10.1186/s12889-015-2333-x>
- 399 7. Issaka AI, Agho KE, Burns P, Page A, Dibley MJ. Determinants of inadequate complementary  
400 feeding practices among children aged 6 – 23 months in Ghana. Public Health Nutr [Internet].  
401 2014;18(4):669–78. Available from: <https://www.cambridge.org/>
- 402 8. Mokori A, Schonfeldt H, Hendriks SL. Child factors associated with complementary feeding  
403 practices in Uganda Child factors associated with complementary feeding practices in Uganda.  
404 South African J Clin Nutr [Internet]. 2017;30(1):7–14. Available from:  
405 <http://dx.doi.org/10.1080/16070658.2016.1225887>
- 406 9. National Statistical Office. Malawi Demographic and Health Survey [Internet]. Zambia; 2015.  
407 Available from: [www.DHSprogram.com](http://www.DHSprogram.com).
- 408 10. Zimbabwe National Statistics Agency. Zimbabwe Demographic and Health Survey  
409 [Internet]. Harare; 2015. Available from: [www.DHSprogram.com](http://www.DHSprogram.com).
- 410 11. International Institute for Population Sciences. India National Family Health Survey  
411 [Internet]. Mumbai; 2015. Available from: [https://dhsprogram.com/pubs/pdf/frind3/frind3-](https://dhsprogram.com/pubs/pdf/frind3/frind3-vollandvol2.pdf)  
412 [vollandvol2.pdf](https://dhsprogram.com/pubs/pdf/frind3/frind3-vollandvol2.pdf)
- 413 12. Ministry of Health, Community Development, Gender E and C. Tanzania [Internet].  
414 daresalam; 2015. Available from: <http://www.dhsprogram.com>.

- 415 13. National Institute of Statistics of Rwanda. Rwanda Demographic and Health Survey  
416 [Internet]. Kigali; 2014. Available from: [www.DHSprogram.com](http://www.DHSprogram.com)
- 417 14. Pakistan National Institute of Population Studies. Pakistan Demographic and Health Survey  
418 [Internet]. Islamabad, Pakistan; 2012. Available from: <http://www.nips.org.pk>
- 419 15. Armenia National Statistical Service. Armenia Demographic and Health Survey [Internet].  
420 Yerevan; 2015. Available from: [www.DHSprogram.com](http://www.DHSprogram.com)
- 421 16. Nepal Ministry of Health. Nepal Demographic and Health Survey [Internet]. Ramshah Path;  
422 2016. Available from: [info@DHSprogram.com](mailto:info@DHSprogram.com)
- 423 17. Federal Democratic Republic of Ethiopia. Implementation Plan ( 2016 – 2030 ) [Internet].  
424 2016. Available from: <https://www.imf.org/external/pubs/ft/scr/2004/cr0437.pdf>
- 425 18. UNICEF. C4D Communication for Development (C4D) Capability Development Framework  
426 [Internet]. UNICEF; 2016. Available from: [http://intranet.unicef.org/pd/cbsc.nsf/Site](http://intranet.unicef.org/pd/cbsc.nsf/SitePages/Page01?OpenDocument&TableRow=3.2.3#3.2)  
427 [Pages/Page01?OpenDocument&TableRow=3.2.3#3.2](http://intranet.unicef.org/pd/cbsc.nsf/SitePages/Page01?OpenDocument&TableRow=3.2.3#3.2)
- 428 19. Ng CS, Dibley MJ, Agho KE. Complementary feeding indicators and determinants of poor  
429 feeding practices in Indonesia: a secondary analysis of 2007 Demographic and Health Survey  
430 data. *Public Health Nutr* [Internet]. 2012;15(5). Available from:  
431 [http://www.journals.cambridge.org/abstract\\_S1368980011002485](http://www.journals.cambridge.org/abstract_S1368980011002485)
- 432 20. Na M, Arimond M, Stewart CP. Risk factors of poor complementary feeding practices in  
433 Pakistani children aged 6 – 23 months : A multilevel analysis of the Demographic and Health  
434 Survey 2012 – 2013. *Matern Child Nutr* [Internet]. 2017;13(November 2016):1–12. Available  
435 from: <https://www.ncbi.nlm.nih.gov/pubmed/29032630>
- 436 21. Ethiopia Health and Nutrition Research Institute and U, Suggested. IYCF practices, beliefs  
437 and influences in Tigray region, Ethiopia. *Alive & Thrive* [Internet]. 2010;(September).  
438 Available from: [aliveandthrive@aed.org](mailto:aliveandthrive@aed.org) [www.aliveandthrive.org](http://www.aliveandthrive.org) September
- 439 22. Khanal V, Sauer K, Zhao Y, Black R, Cousens S, Johnson H, et al. Determinants of  
440 complementary feeding practices among Nepalese children aged 6–23 months: findings from  
441 demographic and health survey 2011. *BMC Pediatr* [Internet]. 2013;13(1):131.
- 442 23. Kabir I, Khanam M, Agho KE, Mirshahi S, Dibley MJ, Roy SK. Determinants of  
443 inappropriate complementary feeding practices in infant and young children in Bangladesh :  
444 secondary data analysis of Demographic Health Survey 2007. *Matern Child Nutr* [Internet].  
445 2012;8:11–27. Available from: <https://www.ncbi.nlm.nih.gov/pubmed/22168516>
- 446 24. Department of Community Medicine, Faculty of Medicine, University of Colombo, 25 K.  
447 Complementary feeding practices in South Asia : *Matern Child Nutr* [Internet]. 2012;8(Who  
448 2002):5–10. Available from: <https://www.ncbi.nlm.nih.gov/pubmed/22168515>

- 449 25. Senarath U, Godakandage SSP, Jayawickrama H, Siriwardena I, Dibley MJ. Determinants of  
450 inappropriate complementary feeding practices in young children in Sri Lanka : secondary data  
451 analysis of Demographic and Health Survey 2006 – 2007. 2012;8:60–77. Available from:  
452 <https://www.ncbi.nlm.nih.gov/pubmed/22168519>
- 453 26. Patel A, Pusdekar Y, Badhoniya N, Borkar J, Agho KE, Dibley MJ. Determinants of  
454 inappropriate complementary feeding practices in young children in India : secondary analysis of  
455 National Family Health Survey 2005 – 2006. 2012;8:28–44. Available from:  
456 <https://www.ncbi.nlm.nih.gov/pubmed/22168517>  
457

459

460
